# Supplementary material
Source: publisher figshare collection journal article supplement (https://aacr.figshare.com/ndownloader/files/39967342)
Supplement: Supplementary file 1 [file 39967342]

# Liu, et al. Supplementary Table 1

| Treatment                                                         | No. of cells quantitated | % interphase | % mitotic | % multinucleate | % unscorable |
|-------------------------------------------------------------------|--------------------------|--------------|-----------|-----------------|--------------|
| <b>Control</b>                                                    |                          |              |           |                 |              |
| 15 hr                                                             | 426                      | 94.1         | 4.5       | 1.2             | 0.2          |
| 30 hr                                                             | 465                      | 94.2         | 4.9       | 0.9             | 0            |
| <b>CNDAC 0.5 <math>\mu</math>M 15 hr <math>\rightarrow</math></b> |                          |              |           |                 |              |
| no wash                                                           | 651                      | 95.1         | 4.1       | 0.8             | 0            |
| no wash $\rightarrow$ 15 hr                                       | 605                      | 96.5         | 2.1       | 0.8             | 0.5          |
| no wash $\rightarrow$ 30 hr                                       | 644                      | 94.7         | 0.6       | 3.9             | 0.8          |
| wash $\rightarrow$ 9 hr                                           | 476                      | 96.8         | 2.1       | 0.4             | 0.6          |
| wash $\rightarrow$ 15 hr                                          | 659                      | 97.4         | 2.6       | 0               | 0            |
| wash $\rightarrow$ 24 hr                                          | 689                      | 97.0         | 2.0       | 0.6             | 0.4          |
| wash $\rightarrow$ 30 hr                                          | 871                      | 96.8         | 2.8       | 0.5             | 0            |
| wash $\rightarrow$ 48 hr                                          | 593                      | 92.7         | 1.2       | 1.5             | 4.6          |
| <b>CNDAC 1 <math>\mu</math>M 15 hr <math>\rightarrow</math></b>   |                          |              |           |                 |              |
| no wash                                                           | 596                      | 94.8         | 3.5       | 1.7             | 0            |
| no wash $\rightarrow$ 15 hr                                       | 566                      | 93.8         | 1.6       | 3.4             | 1.1          |
| no wash $\rightarrow$ 30 hr                                       | 643                      | 96.3         | 1.1       | 1.6             | 1.1          |
| wash $\rightarrow$ 9 hr                                           | 404                      | 95.5         | 4.0       | 0.5             | 0            |
| wash $\rightarrow$ 15 hr                                          | 593                      | 95.8         | 3.5       | 0.2             | 0.5          |
| wash $\rightarrow$ 24 hr                                          | 573                      | 95.6         | 2.3       | 1.0             | 1.0          |
| wash $\rightarrow$ 30 hr                                          | 610                      | 95.2         | 2.5       | 1.8             | 0.4          |
| wash $\rightarrow$ 48 hr                                          | 646                      | 92.1         | 0.8       | 1.9             | 5.3          |
| <b>CNDAC 10 <math>\mu</math>M 15 hr <math>\rightarrow</math></b>  |                          |              |           |                 |              |
| no wash                                                           | 541                      | 97.6         | 1.8       | 0.4             | 0.2          |
| no wash $\rightarrow$ 15 hr                                       | 490                      | 95.3         | 1.0       | 3.3             | 0.4          |
| no wash $\rightarrow$ 30 hr                                       | 522                      | 87.0         | 0.4       | 7.7             | 5.0          |
| wash $\rightarrow$ 9 hr                                           | 516                      | 97.3         | 1.7       | 0.2             | 0.8          |
| wash $\rightarrow$ 15 hr                                          | 488                      | 95.7         | 1.6       | 2.5             | 0.2          |
| wash $\rightarrow$ 24 hr                                          | 609                      | 86.0         | 1.6       | 8.9             | 3.4          |
| wash $\rightarrow$ 30 hr                                          | 643                      | 69.5         | 3.1       | 23.3            | 4.0          |
| wash $\rightarrow$ 48 hr                                          | 506                      | 70.0         | 0         | 23.9            | 6.1          |

**Supplementary Table S1.** Increase in multinucleate cells after washout of CNDAC – a 15-hr schedule. AA8 cells were incubated with 0.5  $\mu$ M, 1  $\mu$ M and 10  $\mu$ M CNDAC for 15 hr before washout and release into drug-free medium. Cells were detached without washing out of CNDAC at indicated times, or at indicated times following washout. Cells were collected onto slides by cytopsin, fixed and stained with Giemsa. Nuclear morphologies of at least 400 cells were analyzed and categorized into interphase, mitotic, multinucleate, etc.
